# Supplementary material for: Identifying predictors to gain sensitivity of nucleic acid amplification tests for Mycobacterium tuberculosis
Source: Research Square preprint supplement (doi:10.21203/rs.3.rs-105455/v1), 2020-11-18
Supplement: Supplementary file 1 [file 4a7672dbdba95d5130e16d7a.docx]

|  |  | **NAAT** | |  |  |
| --- | --- | --- | --- | --- | --- |
|  |  | + | - | Total | *P*-value |
| **Culture** | + | 490 | 71 | 561 | < 0.001 |
| - | 227 | 385 | 612 |  |
|  | Total | 717 | 456 | 1173 |  |

TB, tuberculosis; NAAT, nucleic acid amplification test.

**Table S1. Comparison of the efficiency between culture and NAAT for the diagnosis of pulmonary TB suspects.**
